# Supplementary material for: A 15-Year Nationwide Cohort Study from Taiwan Exploring the Link Between Primary Sjögren’s Syndrome and Temporomandibular Disorder and the Impact of Hydroxychloroquine Treatment
Source: Research Square preprint supplement (doi:10.21203/rs.3.rs-6860309/v1), 2025-07-14
Supplement: Supplementary file 1 [file 3c87b6255243d6d2787fb396.docx]

**Table S2-2. Years to temporomandibular disorder (TMD) from the diagnosis of Sjögren’s syndrome.**

| **Sjögren’s syndrome** | **Min** | **Median** | **Max** | **Mean ± SD** |
| --- | --- | --- | --- | --- |
| With Sjögren’s syndrome | 0.27 | 5.37 | 15.86 | 5.96 ± 4.89 |
| Without Sjögren’s syndrome | 0.31 | 5.98 | 15.89 | 6.18 ± 4.97 |
| Total | 0.27 | 5.66 | 15.89 | 6.14 ± 4.95 |
