# Supplementary material for: A 15-Year Nationwide Cohort Study from Taiwan Exploring the Link Between Primary Sjögren’s Syndrome and Temporomandibular Disorder and the Impact of Hydroxychloroquine Treatment
Source: Research Square preprint supplement (doi:10.21203/rs.3.rs-6860309/v1), 2025-07-14
Supplement: Supplementary file 2 [file 6b05d49136771f9fdf32cef0.docx]

**Table S1. ICD-9-CM diagnostic codes for Sjögren’s syndrome, temporomandibular disorder (TMD), and associated comorbid conditions.**

|  | **ICD-9-CM / Definition** |
| --- | --- |
| **Study population:** Sjögren’s syndrome | 710.2 |
| **Events:** Temporomandibular joint disorder (TMD) | diagnosed by dentists |
| Temporomandibular joint disorder unspecified | 524.60 |
| Adhesions and ankyloses | 524.61 |
| Arthralgia of temporomandibular joint | 524.62 |
| Articular disc disorder | 524.63 |
| Temporomandibular joint sounds on opening and/or closing the jaw | 524.64 |
| Other specified temporomandibular joint disorder | 524.69 |
| **Comorbidities** | 1 year before index date |
| Diabetes mellitus (DM) | 250 |
| Hypertension (HTN) | 401-405 |
| Depression | 296.2, 296.3, 296.82, 300.4, 311 |
| Insomnia | 780.52 |
| Stroke | 430 - 438 |
| Dementia | 290, 294.1, 331.0 |
| Chronic kidney disease | 585-589 |
