# Supplementary material for: A 15-Year Nationwide Cohort Study from Taiwan Exploring the Link Between Primary Sjögren’s Syndrome and Temporomandibular Disorder and the Impact of Hydroxychloroquine Treatment
Source: Research Square preprint supplement (doi:10.21203/rs.3.rs-6860309/v1), 2025-07-14
Supplement: Supplementary file 3 [file c97e764159ea9073004e21b3.docx]

**Table S2-1. Years of follow-up.**

| **Sjögren’s syndrome** | **Min** | **Median** | **Max** | **Mean ± SD** |
| --- | --- | --- | --- | --- |
| With | 0.03 | 7.29 | 15.91 | 8.84 ± 7.28 |
| Without | 0.04 | 7.34 | 15.97 | 8.89 ± 7.33 |
| Total | 0.03 | 7.31 | 15.97 | 8.88 ± 7.32 |
